# Supplementary material for: Highlighting the Use of the Hepatoprotective Nutritional Supplements among Patients with Chronic Diseases
Source: MDPI journal article supplement (doi:10.3390/healthcare11192685), 2023-10-06
Supplement: s1 [file s1]

## QUESTIONNAIRE

Dear Sir/Madam, with this questionnaire we invite you to participate in a study on the administration of dietary supplements.

Your answers are important for us. Thank you!

Age.....

Gender F\_\_\_, M\_\_\_

Environment of origin Urban ☐  
Rural ☐

Do you use dietary supplements? YES ☐  
NO ☐

If yes, in which case?

|               |  |                            |  |
|---------------|--|----------------------------|--|
| Liver disease |  | Protection of the organism |  |
| Prevention    |  | Others                     |  |

What type of dietary supplement do you use ? .....

The use of the dietary supplement was:

|                     |  |                     |  |            |  |
|---------------------|--|---------------------|--|------------|--|
| Own initiative      |  | Friends' advice     |  | Mass media |  |
| The doctor's advice |  | Pharmacist's advice |  | Others     |  |

Regarding the administered dose

|                                                      |  |                                                     |  |
|------------------------------------------------------|--|-----------------------------------------------------|--|
| I use the recommended dose in the supplement leaflet |  | I use the dose recommended by the doctor/pharmacist |  |
| I use a higher dose than the recommended dose        |  | I use a lower dose than the recommended dose        |  |

How long have you been using the dietary supplement?

|                       |  |                  |  |                      |  |
|-----------------------|--|------------------|--|----------------------|--|
| I haven't started yet |  | Less than a week |  | 1-2 weeks            |  |
| One month             |  | Two months       |  | More than two months |  |

During the period of using dietary supplements, what changes have you noticed in your health status?

|                    |  |                    |  |
|--------------------|--|--------------------|--|
| Major improvements |  | Minor improvements |  |
| No change          |  | Worsening          |  |
